# Supplementary material
Source: MDPI journal article supplement (https://www.mdpi.com/2077-0472/12/6/869)
Supplement: s1 [file s1]

**Table S3. Regression Equation and correlation coefficient of 244 compounds in matrix standard curve**

| Compound Name                | Quantitative Ions | Correlation Coefficient (r) | Regression Equation             |
|------------------------------|-------------------|-----------------------------|---------------------------------|
| 2-Aminobenzimidazole         | 134.1 -> 92.0     | 0.9925                      | $y = 113236.88 * x - 1638.37$   |
| 2-Mercaptobenzimidazole      | 151.0 -> 93.0     | 0.9909                      | $y = 1518.53 * x + 656.10$      |
| 2-Methyl-4(5)-nitroimidazole | 128.1 -> 82.0     | 0.9945                      | $y = 20066.22 * x + 1088.73$    |
| 2-Methyl-5-nitroimidazole    | 128.1 -> 82.0     | 0.9912                      | $y = 253732.07 * x + 53246.11$  |
| 3-Methoxytyramine(3-MT )     | 168.1 -> 91.0     | 0.9984                      | $y = 16095.07 * x + 3049.46$    |
| 4-Acetamido antipyrine       | 246.1 -> 227.9    | 0.9936                      | $y = 302910.35 * x + 140012.78$ |
| 4-Formylamino antipyrine     | 232.1 -> 83.0     | 0.9994                      | $y = 91340.52 * x - 9942.28$    |
| 4-Nitroimidazole             | 114.1 -> 68.0     | 0.9996                      | $y = 105014.41 * x - 7766.76$   |
| 4-Nitrophenol                | 138.0 -> 107.9    | 0.9935                      | $y = 629.20 * x + 1179.46$      |
| 5-Hydroxymebendazole         | 298.2 -> 266.1    | 0.9935                      | $y = 464862.53 * x + 698695.23$ |
| 5-Hydroxy-thiabendazole      | 218.0 -> 176.0    | 0.9995                      | $y = 179706.84 * x - 4094.38$   |
| 5-Nitrobenzimidazole         | 164.1 -> 118.0    | 0.9980                      | $y = 180731.27 * x - 2663.29$   |
| Albendazole                  | 266.1 -> 234.1    | 0.9991                      | $y = 400980.53 * x + 21204.12$  |
| Albendazole sulfone          | 298.1 -> 266.1    | 0.9950                      | $y = 1593.01 * x - 270.04$      |
| Alclomethasone dipropionate  | 521.2 -> 279.0    | 0.9987                      | $y = 20444.42 * x - 2374.79$    |
| Amantadine                   | 152.1 -> 135.0    | 0.9979                      | $y = 695570.36 * x + 11453.94$  |
| Amcinonide                   | 503.2 -> 338.9    | 0.9985                      | $y = 21535.47 * x - 1572.73$    |
| Ampicillin                   | 350.1 -> 106.0    | 0.9936                      | $y = 1274.74 * x - 89.28$       |
| Antipyrine                   | 189.0 -> 77.0     | 0.9995                      | $y = 62541.33 * x - 6013.97$    |
| Azaperol                     | 330.0 -> 121.0    | 0.9978                      | $y = 267029.82 * x - 43433.59$  |
| Azaperone                    | 328.0 -> 121.0    | 0.9994                      | $y = 138742.36 * x - 12977.83$  |

---

|                             |                |        |                                 |
|-----------------------------|----------------|--------|---------------------------------|
| Bambuterol                  | 368.1 -> 294.0 | 0.9939 | $y = 437206.65 * x - 13365.75$  |
| Beclomethasone              | 409.2 -> 391.1 | 0.9949 | $y = 32166.20 * x + 3243.10$    |
| Beclomethasone dipropionate | 521.2 -> 503.0 | 0.9972 | $y = 38278.48 * x - 3198.58$    |
| Benzimidazole               | 119.1 -> 65.1  | 0.9947 | $y = 74080.06 * x + 12672.49$   |
| Betamethasone               | 393.2 -> 373.2 | 0.9995 | $y = 93418.18 * x - 8743.58$    |
| Betamethasone valerate      | 477.3 -> 354.9 | 0.9919 | $y = 36005.67 * x - 8192.48$    |
| Betamethasone dipropionate  | 505.2 -> 278.9 | 0.9984 | $y = 33320.71 * x - 4387.84$    |
| Bromchlorbuterol            | 321.0 -> 247.0 | 0.9995 | $y = 55561.47 * x - 4510.84$    |
| Brompheniramine             | 319.1 -> 274.0 | 0.9988 | $y = 112336.62 * x - 10771.59$  |
| Budesonide                  | 431.2 -> 413.1 | 0.9994 | $y = 68353.90 * x - 5944.75$    |
| Cambendazole                | 303.1 -> 217.1 | 0.9980 | $y = 338725.15 * x - 8232.47$   |
| Carazolol                   | 299.2 -> 116.0 | 0.9990 | $y = 279249.02 * x - 21492.72$  |
| Carbadox                    | 263.0 -> 231.0 | 0.9968 | $y = 12975.85 * x + 745.98$     |
| Carbamazepine               | 237.0 -> 194.0 | 0.9915 | $y = 552317.30 * x + 85744.57$  |
| Carbofuran                  | 222.1 -> 123.1 | 0.9995 | $y = 267943.05 * x + 12529.22$  |
| Cefapirin                   | 424.1 -> 291.9 | 0.9989 | $y = 24910.63 * x - 927.23$     |
| Cefotaxime                  | 456.1 -> 125   | 0.9920 | $y = 386098.28 * x + 191187.10$ |
| Ceftiofur                   | 524 -> 210     | 0.9993 | $y = 119717.37 * x - 6412.73$   |
| Chlordimeform               | 197.1 -> 117   | 0.9926 | $y = 6936.47 * x - 1377.83$     |
| Chlormadinone acetate       | 405.2 -> 309.2 | 0.9947 | $y = 50434.50 * x - 7830.61$    |
| Chloroprocaine              | 271.1 -> 100.0 | 0.9927 | $y = 16073.77 * x - 2768.24$    |
| Chlorpheniramine            | 275.1 -> 230.1 | 0.9982 | $y = 137309.50 * x - 13776.80$  |
| Chlorpromazine              | 319.2 -> 86.0  | 0.9981 | $y = 297822.53 * x - 12833.39$  |
| Cinchocaine                 | 344.2 -> 271.1 | 0.9913 | $y = 691719.40 * x + 131663.31$ |

---

---

|                           |                |        |                                 |
|---------------------------|----------------|--------|---------------------------------|
| Cinoxacin                 | 263.0 -> 189.0 | 0.9983 | $y = 217042.73 * x - 19957.63$  |
| Ciprofloxacin             | 332.1 -> 314.1 | 0.9986 | $y = 50810.21 * x + 2694162.55$ |
| Clenbuterol               | 277.1 -> 203.0 | 0.9995 | $y = 225122.65 * x - 18499.40$  |
| Clenbuterol hydroxymethyl | 293.0 -> 275.0 | 0.9997 | $y = 175730.50 * x - 12296.58$  |
| Clencyclohexerol          | 319.1 -> 203.1 | 0.9906 | $y = 51338.23 * x + 4959.96$    |
| Clenhexerol               | 305.1 -> 203.0 | 0.9988 | $y = 263596.65 * x - 21438.09$  |
| Clenisopenterol           | 291.1 -> 273.0 | 0.9986 | $y = 299806.80 * x - 13449.28$  |
| Clenpenterol              | 291.0 -> 203.0 | 0.9992 | $y = 265224.10 * x - 20944.73$  |
| Clenproperol              | 263.0 -> 245.0 | 0.9996 | $y = 272640.68 * x - 10518.28$  |
| Clindamycin               | 425.2 -> 126.0 | 0.9957 | $y = 181961.90 * x + 3039.74$   |
| Clobetasol 17-propionate  | 467.2 -> 372.9 | 0.9991 | $y = 34596.74 * x - 3647.12$    |
| Clobetasone 17-butyrate   | 479.2 -> 278.9 | 0.9970 | $y = 13173.82 * x - 964.46$     |
| Clopidol                  | 192.0 -> 101.0 | 0.9997 | $y = 88202.38 * x - 8016.77$    |
| Clorprenaline             | 214.1 -> 196.0 | 0.9996 | $y = 259641.17 * x - 18042.70$  |
| Cortisone                 | 361.2 -> 163.1 | 0.9985 | $y = 18329.08 * x - 1390.81$    |
| Coumaphos                 | 363.0 -> 226.9 | 0.9978 | $y = 190219.95 * x - 21884.10$  |
| Cyproheptadine            | 288.3 -> 96.0  | 0.9996 | $y = 125742.66 * x - 8330.93$   |
| Danofloxacin              | 358.1 -> 340.1 | 0.9972 | $y = 372376.44 * x - 33347.00$  |
| Dapsone                   | 249.1 -> 92.0  | 0.9989 | $y = 218207.62 * x - 23533.01$  |
| Deflazacort               | 442.2 -> 141.9 | 0.9992 | $y = 15702.63 * x - 1325.91$    |
| Demeclocycline            | 465.1 -> 448.0 | 0.9992 | $y = 1961.35 * x - 449.95$      |
| Desloratadine             | 311.1 -> 258.1 | 0.9987 | $y = 27230.16 * x - 1269.60$    |
| Desoxycarbadox            | 231.0 -> 199.0 | 0.9948 | $y = 526017.30 * x + 53298.66$  |
| Dexamethasone             | 393.1 -> 355.0 | 0.9983 | $y = 61180.05 * x - 6587.85$    |

---

---

|                            |                |        |                                 |
|----------------------------|----------------|--------|---------------------------------|
| Dichlorvos                 | 221.0 -> 109.0 | 0.9997 | $y = 87524.29 * x + 24431.10$   |
| Diflorasone diacetate      | 495.2 -> 316.8 | 0.9974 | $y = 14792.97 * x - 1656.50$    |
| Difloxacin                 | 400.0 -> 382.1 | 0.9983 | $y = 135643.48 * x - 14527.50$  |
| Dimetridazole              | 142.1 -> 96.0  | 0.9988 | $y = 37351.46 * x - 4552.40$    |
| Diphenhydramine            | 256.2 -> 167.1 | 0.9958 | $y = 816977.56 * x + 248293.54$ |
| Doxepin                    | 280.2 -> 107.1 | 0.9988 | $y = 22407.42 * x - 1697.42$    |
| Econazole                  | 381.0 -> 125.0 | 0.9991 | $y = 255924.97 * x - 16136.21$  |
| Enoxacin                   | 321.0 -> 303.2 | 0.9956 | $y = 28343.70 * x + 7687.17$    |
| Enrofloxacin               | 360.0 -> 342.1 | 0.9988 | $y = 163075.96 * x + 28014.88$  |
| Eptestosterone             | 289.2 -> 97.0  | 0.9995 | $y = 60400.49 * x + 5944.23$    |
| Eprinomectin               | 936.4 -> 490.3 | 0.9922 | $y = 367.07 * x + 88.40$        |
| Febantel                   | 447.1 -> 383.1 | 0.9943 | $y = 369284.52 * x - 19369.84$  |
| Fenbendazole               | 300.1 -> 268.0 | 0.9956 | $y = 359424.91 * x + 720722.18$ |
| Fenoterol                  | 304.1 -> 135.2 | 0.9917 | $y = 65801.61 * x + 98.38$      |
| Fenthion sulfoxide         | 295.0 -> 280.0 | 0.9996 | $y = 116770.89 * x - 7979.80$   |
| Fleroxacin                 | 370.1 -> 326.0 | 0.9975 | $y = 131041.11 * x - 17338.76$  |
| Florfenicol                | 356.0 -> 185.1 | 0.9934 | $y = 4720.40 * x + 1608.11$     |
| Flubendazole               | 314.1 -> 282.1 | 0.9983 | $y = 198700.34 * x + 37481.22$  |
| Fluconazole                | 307.1 -> 220.0 | 0.9978 | $y = 33017.15 * x - 3367.08$    |
| Fludrocortisone 21-acetate | 423.2 -> 238.9 | 0.9988 | $y = 2764.85 * x - 213.71$      |
| Fludroxycortide            | 437.2 -> 180.9 | 0.9960 | $y = 3841.22 * x - 764.48$      |
| Flumequine                 | 262.0 -> 202.0 | 0.9990 | $y = 227817.57 * x - 12892.83$  |
| Flumethasone               | 411.2 -> 253.0 | 0.9970 | $y = 11614.50 * x - 1314.54$    |
| Flumethasone pivalate      | 495.3 -> 57.1  | 0.9989 | $y = 19038.23 * x - 534.81$     |

---

---

|                                                  |                |        |                                |
|--------------------------------------------------|----------------|--------|--------------------------------|
| Flunixin                                         | 297.1 -> 279.0 | 0.9984 | $y = 449128.56 * x + 16558.07$ |
| Fluocinolone acetonide                           | 453.2 -> 121.1 | 0.9988 | $y = 14913.68 * x - 868.25$    |
| Fluoromethalone                                  | 377.2 -> 278.9 | 0.9990 | $y = 9073.03 * x - 1198.32$    |
| Fluoxetine                                       | 310.1 -> 44.0  | 0.9972 | $y = 375147.80 * x + 19246.97$ |
| Fluphenazine                                     | 438.1 -> 171.1 | 0.9995 | $y = 245217.11 * x - 18000.86$ |
| Fluticasone propionate                           | 501.2 -> 292.9 | 0.9989 | $y = 26122.06 * x - 3086.85$   |
| Formoterol                                       | 345.0 -> 149.0 | 0.9995 | $y = 218825.07 * x - 10372.52$ |
| Gatifloxacin                                     | 376.2 -> 261.0 | 0.9987 | $y = 76894.07 * x - 6847.28$   |
| Gemifloxacin                                     | 390.1 -> 372.0 | 0.9984 | $y = 71598.11 * x + 12306.05$  |
| Griseofulvin                                     | 353.1 -> 165.1 | 0.9987 | $y = 62288.83 * x - 3606.39$   |
| Halcinonide                                      | 455.2 -> 121.0 | 0.9985 | $y = 5262.98 * x - 56.82$      |
| Halofuginone                                     | 414.0 -> 100.1 | 0.9969 | $y = 22081.30 * x + 2537.03$   |
| Haloperidol                                      | 376.1 -> 123.0 | 0.9987 | $y = 329986.60 * x - 27256.25$ |
| 2-Hydroxymethyl-1-methyl-5-nitroimidazole(HMMNI) | 158.1 -> 140.0 | 0.9999 | $y = 34213.20 * x - 5383.08$   |
| Hydrocortisone                                   | 363.2 -> 121.0 | 0.9980 | $y = 15376.52 * x - 2246.58$   |
| Hydroxy-ipronidazole                             | 186.1 -> 168.0 | 0.9997 | $y = 120625.17 * x + 14550.37$ |
| Hydroxyzine                                      | 375.2 -> 201.0 | 0.9988 | $y = 307356.24 * x - 19672.80$ |
| Imipramine                                       | 281.2 -> 86.1  | 0.9982 | $y = 442885.07 * x + 1606.36$  |
| Indoprofen                                       | 282.1 -> 236.1 | 0.9991 | $y = 208338.96 * x + 19669.01$ |
| Ipronidazole                                     | 170.1 -> 109.0 | 0.9997 | $y = 73102.13 * x - 6819.69$   |
| Isoxsuprine                                      | 302.1 -> 284.1 | 0.9966 | $y = 459517.84 * x + 776.82$   |
| Ivermectin                                       | 897.4 -> 753.3 | 0.9949 | $y = 3850.82 * x + 136.71$     |
| Ketoconazole                                     | 531.2 -> 82.1  | 0.9991 | $y = 26361.53 * x - 3787.41$   |

---

---

|                                |                |        |                                |
|--------------------------------|----------------|--------|--------------------------------|
| Ketoprofen                     | 255.1 -> 105.0 | 0.9986 | $y = 85344.22 * x - 2104.76$   |
| Ketotifen                      | 310.1 -> 96.1  | 0.9992 | $y = 282803.42 * x - 22352.61$ |
| Labetalol                      | 329.0 -> 311.0 | 0.9947 | $y = 169042.94 * x + 11849.75$ |
| Levamisole                     | 205.0 -> 178.0 | 0.9990 | $y = 212079.00 * x - 24867.37$ |
| Lidocaine/Diocaine             | 235.2 -> 86.1  | 0.9960 | $y = 758293.70 * x - 28137.65$ |
| Lincomycin                     | 407.2 -> 126.0 | 0.9995 | $y = 121283.75 * x + 5492.17$  |
| Invisible malachite green(LMG) | 331.2 -> 239.1 | 0.9956 | $y = 490076.11 * x - 93465.39$ |
| Lomefloxacin                   | 352.1 -> 265.1 | 0.9991 | $y = 88293.79 * x + 4691.58$   |
| Loratadine                     | 383.2 -> 337.1 | 0.9965 | $y = 226002.58 * x - 33068.98$ |
| Lornoxicam                     | 372.0 -> 95.1  | 0.9996 | $y = 28774.05 * x - 326.47$    |
| Maduramycin                    | 934.4 -> 629.4 | 0.9920 | $y = 7386.63 * x - 1598.13$    |
| Marbofloxacin                  | 363.0 -> 320.1 | 0.9986 | $y = 40047.07 * x - 4082.33$   |
| Mebendazole                    | 296.1 -> 264.1 | 0.9996 | $y = 160049.71 * x + 462.94$   |
| Mebendazole-amine(HMEB)        | 238.0 -> 77.0  | 0.9959 | $y = 121354.16 * x + 5928.66$  |
| Mefenamic acid                 | 242.1 -> 224.1 | 0.9969 | $y = 22821.90 * x + 32549.33$  |
| Megestrol acetate              | 385.2 -> 325.2 | 0.9985 | $y = 96955.72 * x - 8211.46$   |
| Melengestrol acetate           | 397.2 -> 279.2 | 0.9962 | $y = 88038.39 * x - 3780.18$   |
| Melitracene                    | 292.2 -> 247.1 | 0.9980 | $y = 327159.73 * x - 17408.21$ |
| Meloxicam                      | 352.0 -> 115.0 | 0.9992 | $y = 104900.64 * x - 3615.82$  |
| Metaproterenol                 | 212.1 -> 152.0 | 0.9995 | $y = 29341.63 * x - 2630.47$   |
| Methylprednisolone             | 375.2 -> 357.1 | 0.9960 | $y = 40870.68 * x - 1087.58$   |
| Methylprednisolone 21-acetate  | 417.2 -> 399.2 | 0.9966 | $y = 22870.98 * x - 6482.87$   |
| Methyltestosterone             | 303.2 -> 97.1  | 0.9997 | $y = 89096.66 * x - 5621.69$   |
| Metronidazole                  | 172.1 -> 128.0 | 0.9928 | $y = 184284.45 * x - 35525.88$ |

---

---

|                              |                |        |                                |
|------------------------------|----------------|--------|--------------------------------|
| Miconazole                   | 415.0 -> 159.0 | 0.9926 | $y = 171876.88 * x - 24543.28$ |
| Hydroxy metronidazole(MNZOH) | 188.1 -> 123.0 | 0.9940 | $y = 11722.88 * x - 2400.12$   |
| Mometasone furoate           | 521.1 -> 503.0 | 0.9967 | $y = 22926.93 * x + 804.83$    |
| Monensin                     | 688.5 -> 635.4 | 0.9948 | $y = 148899.80 * x + 1913.31$  |
| Moxifloxacin                 | 402.2 -> 364.2 | 0.9971 | $y = 16064.63 * x - 2188.80$   |
| Nabumetone                   | 229.0 -> 171.0 | 0.9966 | $y = 220805.02 * x - 27998.19$ |
| N-Acetyl dapson              | 291.1 -> 155.8 | 0.9993 | $y = 30798.02 * x - 2873.37$   |
| Nadifloxacin                 | 361.1 -> 283.0 | 0.9979 | $y = 52557.33 * x - 3979.56$   |
| Nafcillin                    | 415.1 -> 171.0 | 0.9979 | $y = 713.27 * x + 104.57$      |
| Naftifine                    | 288.2 -> 117.1 | 0.9989 | $y = 58011.50 * x - 16613.24$  |
| Nalidixic acid               | 233.0 -> 215.0 | 0.9993 | $y = 673178.57 * x + 46863.99$ |
| Nandrolone                   | 275.2 -> 109.0 | 0.9998 | $y = 48678.05 * x - 4329.41$   |
| Naproxen                     | 231.0 -> 185.0 | 0.9944 | $y = 11540.41 * x + 82.75$     |
| Nequinat                     | 366.2 -> 334.1 | 0.9967 | $y = 457371.17 * x - 9972.53$  |
| Nigericin                    | 742.5 -> 657.2 | 0.9931 | $y = 58746.71 * x + 2941.04$   |
| Nimorazole                   | 227.1 -> 114.1 | 0.9996 | $y = 7782.90 * x - 256.05$     |
| Norfloxacin                  | 320.0 -> 302.1 | 0.9996 | $y = 233472.99 * x - 4190.20$  |
| Ofloxacin                    | 362.0 -> 318.1 | 0.9995 | $y = 180359.24 * x - 1881.54$  |
| Oleandomycin                 | 688.3 -> 158.2 | 0.9994 | $y = 87317.80 * x - 8174.84$   |
| Orbifloxacin                 | 396.1 -> 352.1 | 0.9996 | $y = 134971.29 * x - 9046.54$  |
| Oxaprozin                    | 294.1 -> 103.1 | 0.9988 | $y = 83197.56 * x - 1546.31$   |
| Oxfendazole                  | 316.1 -> 159.0 | 0.9925 | $y = 75232.32 * x + 640692.91$ |
| Oxibendazole                 | 250.1 -> 176.0 | 0.9997 | $y = 472102.94 * x + 15362.45$ |
| Oxolinic acid                | 262.1 -> 216.0 | 0.9992 | $y = 94284.90 * x - 6433.50$   |

---

---

|                      |                |        |                                 |
|----------------------|----------------|--------|---------------------------------|
| Oxytetracycline(OTC) | 461.15 ->426   | 0.9961 | $y = 18898.80 * x - 3031.09$    |
| Paracetamol          | 152.1 -> 110.0 | 0.9905 | $y = 135981.29 * x + 68084.730$ |
| Pefloxacin           | 334.2 -> 290.1 | 0.9988 | $y = 40384.21 * x - 3906.64$    |
| Penbutolol           | 292.2 -> 236.0 | 0.9951 | $y = 354130.77 * x - 6890.970$  |
| Phenacetin           | 180.0 -> 110.0 | 0.9935 | $y = 478936.69 * x + 29672.68$  |
| Phenylbutazone       | 309.0 -> 120.0 | 0.9981 | $y = 3876.66 * x + 71.96$       |
| Phenylethanolamine A | 345.2 -> 327.1 | 0.9915 | $y = 428878.66 * x + 21236.55$  |
| Pipemidic acid       | 304.0 -> 286.0 | 0.9990 | $y = 90304.28 * x - 1405.41$    |
| Pirbuterol acetate   | 241.2 -> 167.0 | 0.9925 | $y = 124037.99 * x + 2710.59$   |
| Piroxicam            | 332.1 -> 95.0  | 0.9998 | $y = 130410.21 * x - 10039.46$  |
| Prednicarbate        | 489.2 -> 380.9 | 0.9991 | $y = 37912.56 * x - 1831.49$    |
| Prednisolone         | 361.2 -> 343.1 | 0.9973 | $y = 45340.41 * x + 1604.68$    |
| Prednisone           | 359.2 -> 341.1 | 0.9975 | $y = 14443.34 * x - 1237.49$    |
| Procainamide         | 236.2 -> 163.1 | 0.9931 | $y = 91482.90 * x - 6011.49$    |
| Procaine/Novocaine   | 237.2 -> 100.1 | 0.9985 | $y = 5807.10 * x - 2236.71$     |
| Procaterol           | 291.1 -> 273.1 | 0.9999 | $y = 27563.21 * x + 2282.08$    |
| Progesterone         | 315.2 -> 97.0  | 0.9957 | $y = 3102.19 * x + 6594953.38$  |
| Promethazine         | 285.1 -> 86.1  | 0.9958 | $y = 393104.44 * x - 25213.75$  |
| Propetamphos         | 282.1 -> 137.9 | 0.9963 | $y = 14792.25 * x - 1752.56$    |
| Propionylpromazine   | 341.2 -> 86.0  | 0.9915 | $y = 407145.43 * x - 9830.59$   |
| Propranolol          | 260 -> 116     | 0.9978 | $y = 21109.96 * x - 1768.87$    |
| Propyl thiouracil    | 171.0 -> 112.0 | 0.9977 | $y = 8517.83 * x - 389.18$      |
| Ractopamine          | 302.0 -> 121.0 | 0.9970 | $y = 39869.17 * x + 843.71$     |
| Ritodrine            | 288.1 -> 270.1 | 0.9936 | $y = 49121.30 * x + 446.58$     |

---



---

|                        |                |        |                                    |
|------------------------|----------------|--------|------------------------------------|
| Robenidine             | 334.1 -> 111.0 | 0.9989 | $y = 71150.54 \cdot x + 2524.27$   |
| Ronidazole             | 201.1 -> 140.0 | 0.9986 | $y = 92614.15 \cdot x + 9485.39$   |
| Salbutamol             | 240.0 -> 148.0 | 0.9974 | $y = 97063.66 \cdot x - 4726.33$   |
| Salmeterol             | 416.1 -> 398.2 | 0.9968 | $y = 95020.39 \cdot x + 6595.39$   |
| Sarafloxacin           | 386.1 -> 368.1 | 0.9987 | $y = 132631.68 \cdot x - 8040.42$  |
| Secnidazole            | 186.1 -> 128.1 | 0.9967 | $y = 156464.80 \cdot x + 4932.56$  |
| Sineptina              | 786.5 -> 109.0 | 0.9972 | $y = 3228.39 \cdot x - 591.31$     |
| Sotalol                | 273.1 -> 255.1 | 0.9982 | $y = 17789.38 \cdot x - 2909.56$   |
| Sparfloxacin           | 393.1 -> 349.0 | 0.9927 | $y = 121953.87 \cdot x - 21084.55$ |
| Sulfabenzamide         | 277.1 -> 156.0 | 0.9955 | $y = 151223.78 \cdot x + 6612.16$  |
| Sulfachloropyridazine  | 285.0 -> 156.0 | 0.9983 | $y = 53716.91 \cdot x - 145.21$    |
| Sulfadiazine           | 251.1 -> 156.0 | 0.9949 | $y = 79691.62 \cdot x + 2418.17$   |
| Sulfadimethoxine       | 311.0 -> 156.0 | 0.9993 | $y = 148404.47 \cdot x - 2794.67$  |
| Sulfadimidine          | 279.1 -> 186.1 | 0.9966 | $y = 96312.47 \cdot x + 1734.58$   |
| Sulfadoxine            | 311.1 -> 156.0 | 0.9999 | $y = 198619.38 \cdot x - 8997.92$  |
| Sulfamerazine          | 265.1 -> 156.0 | 0.9997 | $y = 75161.06 \cdot x - 5620.13$   |
| Sulfameter             | 281.0 -> 156.0 | 0.9994 | $y = 98273.72 \cdot x - 4760.58$   |
| Sulfamethizole         | 271.0 -> 156.0 | 0.9996 | $y = 53541.10 \cdot x - 4003.88$   |
| Sulfamethoxazole       | 254.1 -> 108.0 | 0.9920 | $y = 57679.01 \cdot x + 3466.64$   |
| Sulfamethoxypyridazine | 281.1 -> 156.0 | 0.9991 | $y = 52437.36 \cdot x - 5953.25$   |
| Sulfamonomethoxine     | 281.1 -> 156.1 | 0.9990 | $y = 40702.77 \cdot x - 2455.06$   |
| Sulfamoxol             | 268.0 -> 156.0 | 0.9905 | $y = 61065.61 \cdot x + 3906.54$   |
| Sulfanilamide          | 173.0 -> 156.0 | 0.9906 | $y = 18490.00 \cdot x - 5061.15$   |
| Sulfanitran            | 336.1 -> 156.0 | 0.9906 | $y = 611.66 \cdot x - 102.63$      |

---

---

|                         |                |        |                                |
|-------------------------|----------------|--------|--------------------------------|
| Sulfaphenazole          | 315.0 -> 158.0 | 0.9967 | $y = 86613.75 * x + 2056.55$   |
| Sulfapyrazole           | 329.1 -> 172.0 | 0.9994 | $y = 200902.25 * x - 9426.45$  |
| Sulfapyridine           | 250.1 -> 156.0 | 0.9998 | $y = 56593.67 * x - 4479.73$   |
| Sulfaquinoxaline        | 301.1 -> 156.0 | 0.9981 | $y = 42521.03 * x - 523.12$    |
| Sulfathiazole           | 256.0 -> 156.0 | 0.9992 | $y = 59819.74 * x - 3944.04$   |
| Sulfisomidine           | 279.0 -> 124.0 | 0.9921 | $y = 117637.48 * x + 941.09$   |
| Sulindac                | 357.1 -> 233.1 | 0.9980 | $y = 66058.09 * x - 8490.08$   |
| Sulphacetamide          | 215.1 -> 156.1 | 0.9983 | $y = 115608.82 * x - 9843.52$  |
| Sulpiride               | 342.1 -> 112.1 | 0.9938 | $y = 42717.72 * x + 5639.09$   |
| Tenoxicam               | 338.0 -> 78.0  | 0.9971 | $y = 47575.10 * x + 632.74$    |
| Terbutaline             | 226.1 -> 152.1 | 0.9965 | $y = 86488.41 * x - 27554.45$  |
| Terfenadine             | 472.3 -> 454.3 | 0.9992 | $y = 203871.32 * x - 19387.09$ |
| Testosterone            | 289.2 -> 97.0  | 0.9994 | $y = 130631.15 * x - 497.38$   |
| Tetracaine              | 265.2 -> 176.1 | 0.9987 | $y = 87057.60 * x - 10397.52$  |
| Thiabendazole           | 202.0 -> 175.0 | 0.9920 | $y = 256644.62 * x + 405.75$   |
| Tilmicosin              | 869.6 -> 174.0 | 0.9961 | $y = 4821.50 * x - 506.66$     |
| Tinidazole              | 248.0 -> 121.0 | 0.9979 | $y = 72082.94 * x + 1003.62$   |
| Tolfenamic acid         | 262.1 -> 244.0 | 0.9937 | $y = 12057.01 * x + 3329.39$   |
| Tolmetin                | 258.1 -> 119.0 | 0.9991 | $y = 90138.23 * x - 6339.63$   |
| Toltrazuril             | 424.12 -> 42.2 | 0.9974 | $y = 2281.09 * x - 595.71$     |
| Toltrazuril sulfone     | 457 -> 456     | 0.9978 | $y = 134100.58 * x - 17551.52$ |
| Toltrazuril-sulfoxide   | 4403 -> 71     | 0.9929 | $y = 49756.65 * x - 10106.22$  |
| Tosufloxacin            | 405.1 -> 314.0 | 0.9978 | $y = 6356.77 * x - 775.15$     |
| Triamcinolone acetonide | 435.2 -> 396.9 | 0.9976 | $y = 21502.34 * x - 1415.20$   |

---

---

|                  |                |        |                                |
|------------------|----------------|--------|--------------------------------|
| Triclabendazole  | 359.0 -> 274.0 | 0.9980 | $y = 103850.16 * x - 11561.42$ |
| Trimethoprim     | 291.1 -> 230.1 | 0.9993 | $y = 141363.48 * x - 12479.50$ |
| Tulobuterol      | 228.1 -> 154.0 | 0.9984 | $y = 452168.38 * x - 29135.75$ |
| Tylosin          | 916.5 -> 174.0 | 0.9988 | $y = 15351.90 * x - 1661.78$   |
| Valnemulin       | 567.4 -> 264.2 | 0.9946 | $y = 3554.41 * x - 501.32$     |
| Virginiamycin M1 | 526.3 -> 508.4 | 0.9995 | $y = 72065.91 * x - 3851.39$   |
| Xylazine         | 221.1 -> 90.0  | 0.9992 | $y = 173737.15 * x - 16493.98$ |
| Zolpidem         | 308.2 -> 235.1 | 0.9987 | $y = 372352.28 * x - 34502.59$ |

---
