# Supplementary material
Source: MDPI journal article supplement (https://www.mdpi.com/2077-0472/12/6/869)
Supplement: s1 [file s1]

**Table S2. The mass spectrometry parameters of 244 chemical contaminants**

| Classification              | Compound Name            | Prec Ion | Prod Ion | Frag (V) | CE (V) | Cell Acc (V) | Ret Time (min) | Ret Window | Polarity |
|-----------------------------|--------------------------|----------|----------|----------|--------|--------------|----------------|------------|----------|
| $\beta$ -Lactam antibiotics | Ampicillin               | 350.1    | 160      | 110      | 6      | 3            | 10.37          | 1          | Positive |
|                             |                          |          | 106      |          | 12     |              |                |            |          |
|                             |                          |          | 364      |          | 8      |              |                |            |          |
|                             | Cefapirin                | 424.1    | 291.9    | 132      | 12     | 3            | 3.75           | 1          | Positive |
|                             |                          |          | 151.9    |          | 28     |              |                |            |          |
|                             |                          |          | 324      |          | 8      |              |                |            |          |
|                             | Cefotaxime               | 456.1    | 125      | 132      | 60     | 4            | 5.16           | 1          | Positive |
|                             |                          |          | 395.9    |          | 4      |              |                |            |          |
|                             |                          |          | 241      |          | 16     |              |                |            |          |
|                             | Ceftiofur                | 524      | 210      | 141      | 20     | 4            | 9.09           | 1          | Positive |
|                             |                          |          | 126      |          | 40     |              |                |            |          |
|                             |                          |          | 199      |          | 8      |              |                |            |          |
|                             | Nafcillin                | 415.1    | 171      | 110      | 35     | 3            | 16.5           | 1          | Positive |
|                             |                          |          |          |          |        |              |                |            |          |
|                             | 3-Methoxytyramine (3-MT) | 168.1    | 119      | 60       | 15     | 3            | 4.33           | 0.9        | Positive |
|                             |                          |          | 91       |          | 24     |              |                |            |          |
|                             | Bambuterol               | 368.1    | 312      | 120      | 8      | 3            | 12.69          | 1          | Positive |
|                             |                          |          | 294      |          | 20     |              |                |            |          |
|                             | Bromchlorbuterol         | 321      | 247      | 110      | 10     | 3            | 11.4           | 1          | Positive |
|                             |                          |          | 168      |          | 15     |              |                |            |          |
|                             | Clenbuterol              | 277.1    | 259.1    | 100      | 5      | 3            | 10.79          | 1          | Positive |
|                             |                          |          | 203      |          | 12     |              |                |            |          |

|                        |                           |       |                |     |          |   |       |      |          |
|------------------------|---------------------------|-------|----------------|-----|----------|---|-------|------|----------|
| β-Adrenergic receptors | Clenbuterol hydroxymethyl | 293   | 275<br>203     | 110 | 10<br>20 | 3 | 9.07  | 0.8  | Positive |
|                        | Clencyclohexerol          | 319.1 | 203.1<br>168.1 | 110 | 15<br>35 | 3 | 8.32  | 0.91 | Positive |
|                        | Clenhexerol               | 305.1 | 203<br>132     | 110 | 20<br>35 | 3 | 13.79 | 0.8  | Positive |
|                        | Clenisopenterol           | 291.1 | 273<br>188     | 110 | 10<br>20 | 3 | 13.25 | 0.5  | Positive |
|                        | Clenpenterol              | 291   | 273<br>203     | 105 | 8<br>15  | 3 | 12.45 | 0.5  | Positive |
|                        | Clenproperol              | 263   | 245<br>203     | 100 | 10<br>15 | 3 | 9.23  | 0.91 | Positive |
|                        | Clorprenaline             | 214.1 | 196<br>153.9   | 112 | 8<br>12  | 4 | 10.33 | 1.2  | Positive |
|                        | Fenoterol                 | 304.1 | 286.2<br>135.2 | 120 | 5<br>15  | 3 | 7.05  | 0.91 | Positive |
|                        | Formoterol                | 345   | 149<br>121     | 120 | 15<br>20 | 3 | 11.1  | 1    | Positive |
|                        | Isoxsuprine               | 302.1 | 284.1<br>107   | 80  | 10<br>30 | 3 | 12.3  | 1    | Positive |
|                        | Labetalol                 | 329   | 311<br>207     | 120 | 10<br>15 | 3 | 13.15 | 1    | Positive |
|                        | Metaproterenol            | 212.1 | 194.1<br>152   | 70  | 6<br>14  | 3 | 3.9   | 1.2  | Positive |

|                       |                      |       |                |     |          |   |        |      |          |
|-----------------------|----------------------|-------|----------------|-----|----------|---|--------|------|----------|
|                       | Phenylethanolamine A | 345.2 | 327.1<br>150.1 | 100 | 9<br>20  | 3 | 13.9   | 0.8  | Positive |
|                       | Procaterol           | 291.1 | 273.1<br>231.1 | 100 | 6<br>18  | 3 | 6.79   | 1    | Positive |
|                       | Ractopamine          | 302   | 164.1<br>121   | 110 | 10<br>22 | 3 | 9.65   | 0.96 | Positive |
|                       | Ritodrine            | 288.1 | 270.1<br>121   | 100 | 6<br>18  | 3 | 7.48   | 0.91 | Positive |
|                       | Salbutamol           | 240   | 222.1<br>148   | 100 | 5<br>13  | 3 | 5.28   | 0.91 | Positive |
|                       | Salmeterol           | 416.1 | 398.2<br>380.2 | 130 | 10<br>18 | 3 | 15.95  | 1    | Positive |
|                       | Sotalol              | 273.1 | 255.1<br>213.1 | 150 | 10<br>20 | 3 | 5.07   | 0.89 | Positive |
|                       | Terbutaline          | 226.1 | 152.1<br>107   | 90  | 10<br>25 | 3 | 5.08   | 1.2  | Positive |
|                       | Tulobuterol          | 228.1 | 172<br>154     | 100 | 5<br>13  | 3 | 11.87  | 1    | Positive |
|                       | <hr/>                |       |                |     |          |   |        |      |          |
| Macrolide antibiotics | Clindamycin          | 425.2 | 377<br>126     | 120 | 20<br>30 | 3 | 14.08  | 1    | Positive |
|                       | Eprinomectin         | 936.4 | 490.3<br>352.2 | 200 | 59<br>65 | 3 | 19.63  | 1    | Positive |
|                       | Oleandomycin         | 688.3 | 544.3<br>158.2 | 170 | 15<br>25 | 4 | 14.501 | 1.2  | Positive |

|                       |       |                |     |          |   |       |      |          |
|-----------------------|-------|----------------|-----|----------|---|-------|------|----------|
| Sineptina             | 786.5 | 229.3<br>109   | 180 | 30<br>45 | 3 | 15.82 | 1    | Positive |
| Tilmicosin            | 869.6 | 696.4<br>174   | 250 | 45<br>50 | 3 | 13.82 | 1    | Positive |
| Tylosin               | 916.5 | 174<br>101     | 240 | 42<br>54 | 3 | 15.24 | 1    | Positive |
| Sulfabenzamide        | 277.1 | 156<br>108     | 80  | 10<br>25 | 3 | 11.72 | 1    | Positive |
| Sulfachloropyridazine | 285   | 156<br>108     | 100 | 10<br>25 | 3 | 10.04 | 1    | Positive |
| Sulfadiazine          | 251.1 | 156<br>108     | 100 | 10<br>22 | 3 | 6.14  | 0.99 | Positive |
| Sulfadimethoxine      | 311   | 156<br>108     | 130 | 20<br>26 | 3 | 12.98 | 1    | Positive |
| Sulfadimidine         | 279.1 | 186.1<br>156.1 | 120 | 15<br>16 | 3 | 9.03  | 0.8  | Positive |
| Sulfadoxine           | 311.1 | 156<br>92      | 120 | 15<br>30 | 3 | 10.91 | 1    | Positive |
| Sulfamerazine         | 265.1 | 172<br>156     | 110 | 12<br>15 | 3 | 7.65  | 0.99 | Positive |
| Sulfameter            | 281   | 156<br>108     | 110 | 15<br>25 | 3 | 9.39  | 0.6  | Positive |
| Sulfamethizole        | 271   | 156<br>108     | 90  | 10<br>22 | 3 | 8.8   | 1    | Positive |

|              |                        |        |                |     |          |   |       |      |          |
|--------------|------------------------|--------|----------------|-----|----------|---|-------|------|----------|
| Sulfonamides | Sulfamethoxazole       | 254.1  | 156<br>108     | 100 | 10<br>25 | 3 | 10.26 | 1    | Positive |
|              | Sulfamethoxypyridazine | 281.1  | 156<br>108     | 105 | 15<br>25 | 3 | 8.67  | 0.6  | Positive |
|              | Sulfamonomethoxine     | 281.11 | 156.1<br>108.1 | 100 | 15<br>26 | 3 | 10.45 | 0.6  | Positive |
|              | Sulfamoxol             | 268    | 156<br>113     | 110 | 13<br>16 | 3 | 10.95 | 0.8  | Positive |
|              | Sulfanilamide          | 173    | 156<br>92      | 70  | 5<br>25  | 3 | 3.1   | 1.2  | Positive |
|              | Sulfanitran            | 336.07 | 293.9<br>156   | 100 | 8<br>8   | 3 | 14.84 | 1    | Positive |
|              | Sulfaphenazole         | 315    | 222<br>158     | 130 | 15<br>30 | 3 | 12.39 | 1    | Positive |
|              | Sulfapyrazole          | 329.1  | 172<br>145     | 120 | 30<br>50 | 3 | 13.27 | 1    | Positive |
|              | Sulfapyridine          | 250.1  | 184<br>156     | 110 | 15<br>10 | 3 | 7.11  | 0.99 | Positive |
|              | Sulfaquinoxaline       | 301.1  | 156<br>108     | 110 | 11<br>22 | 3 | 13.33 | 1    | Positive |
|              | Sulfathiazole          | 256    | 156<br>108     | 100 | 10<br>21 | 3 | 6.67  | 0.99 | Positive |
|              | Sulfisomidine          | 279    | 186<br>124     | 100 | 15<br>20 | 3 | 6.23  | 1    | Positive |

|                       |                 |       |                |     |          |   |       |      |          |
|-----------------------|-----------------|-------|----------------|-----|----------|---|-------|------|----------|
|                       | Sulphacetamide  | 215.1 | 156.1<br>92    | 70  | 5<br>20  | 3 | 5.21  | 1    | Positive |
| Psychiatric drugs     | Carbamazepine   | 237   | 194<br>179     | 110 | 15<br>35 | 3 | 15.49 | 1    | Positive |
|                       | Diphenhydramine | 256.2 | 167.1<br>165.1 | 80  | 4<br>44  | 3 | 14.1  | 0.8  | Positive |
|                       | Doxepin         | 280.2 | 107.1<br>77.1  | 118 | 20<br>60 | 3 | 14.31 | 1    | Positive |
|                       | Fluoxetine      | 310.1 | 148.1<br>44    | 93  | 2<br>15  | 3 | 15.6  | 0.8  | Positive |
|                       | Imipramine      | 281.2 | 86.1<br>58.2   | 118 | 12<br>44 | 3 | 15.28 | 1    | Positive |
|                       | Sulpiride       | 342.1 | 214<br>112.1   | 150 | 40<br>20 | 3 | 5.21  | 0.84 | Positive |
|                       | Zolpidem        | 308.2 | 236.1<br>235.1 | 176 | 24<br>36 | 3 | 12.2  | 1    | Positive |
| Polyether antibiotics | Maduramycin     | 934.4 | 647.3<br>629.4 | 179 | 16<br>20 | 3 | 20.3  | 1.4  | Positive |
|                       | Nigericin       | 742.5 | 675.3<br>657.2 | 170 | 25<br>25 | 3 | 20.49 | 1.4  | Positive |
|                       | Econazole       | 381   | 125<br>69      | 150 | 40<br>20 | 3 | 16.63 | 0.8  | Positive |
|                       | Fluconazole     | 307.1 | 238<br>220     | 120 | 10<br>20 | 3 | 12.07 | 0.8  | Positive |

|                     |                  |       |                |     |          |   |       |     |          |
|---------------------|------------------|-------|----------------|-----|----------|---|-------|-----|----------|
| Antifungal drugs    | Griseofulvin     | 353.1 | 215<br>165.1   | 150 | 20<br>20 | 3 | 15.86 | 0.8 | Positive |
|                     | Ketoconazole     | 531.2 | 489.1<br>82.1  | 150 | 40<br>40 | 3 | 15.34 | 0.8 | Positive |
|                     | Miconazole       | 415   | 159<br>69      | 150 | 40<br>20 | 3 | 17.19 | 0.8 | Positive |
|                     | Naftifine        | 288.2 | 141.1<br>117.1 | 150 | 20<br>20 | 3 | 15.1  | 0.8 | Positive |
| Antihistamine drugs | Brompheniramine  | 319.1 | 274<br>167.1   | 150 | 20<br>40 | 3 | 13.34 | 0.8 | Positive |
|                     | Chlorpheniramine | 275.1 | 230.1<br>167.1 | 150 | 20<br>40 | 3 | 12.81 | 0.8 | Positive |
|                     | Chlorpromazine   | 319.2 | 246<br>86      | 120 | 20<br>15 | 3 | 15.94 | 0.8 | Positive |
|                     | Cyproheptadine   | 288.3 | 191<br>96      | 160 | 28<br>24 | 3 | 15.21 | 0.8 | Positive |
|                     | Desloratadine    | 311.1 | 259.1<br>258.1 | 150 | 20<br>40 | 3 | 13.25 | 0.8 | Positive |
|                     | Fluphenazine     | 438.1 | 171.1<br>143   | 120 | 26<br>30 | 3 | 16.53 | 0.8 | Positive |
|                     | Hydroxyzine      | 375.2 | 201<br>166.1   | 150 | 20<br>40 | 3 | 15.43 | 0.8 | Positive |
|                     | Loratadine       | 383.2 | 337.1<br>267.1 | 150 | 20<br>40 | 3 | 17.3  | 1   | Positive |

|                         |                                    |        |                |     |          |   |       |      |          |
|-------------------------|------------------------------------|--------|----------------|-----|----------|---|-------|------|----------|
|                         | Promethazine                       | 285.1  | 86.1<br>71.1   | 118 | 16<br>48 | 3 | 14.86 | 0.8  | Positive |
|                         | Terfenadine                        | 472.3  | 454.3<br>436.3 | 150 | 20<br>20 | 3 | 16.63 | 0.8  | Positive |
| Malachite Green         | Invisible malachite green<br>(LMG) | 331.2  | 239.1<br>223.1 | 150 | 30<br>55 | 3 | 16.7  | 2    | Positive |
| Lincosamide antibiotics | Lincomycin                         | 407.2  | 359<br>126     | 150 | 15<br>30 | 3 | 8.08  | 1    | Positive |
|                         | 2-Methyl-4(5)-nitroimidazole       | 128.11 | 82<br>42       | 90  | 16<br>36 | 3 | 8.35  | 0.91 | Positive |
|                         | 2-Methyl-5-nitroimidazole          | 128.1  | 82<br>42       | 90  | 16<br>36 | 3 | 4.85  | 1.2  | Positive |
|                         | 4-Nitroimidazole                   | 114.1  | 97<br>68       | 90  | 15<br>25 | 3 | 3.46  | 0.95 | Positive |
|                         | 5-Hydroxy-thiabendazole            | 218    | 176<br>148     | 160 | 17<br>25 | 3 | 14    | 1    | Positive |
|                         | Febantel                           | 447.1  | 415.1<br>383.1 | 128 | 10<br>16 | 3 | 17.76 | 1.2  | Positive |
|                         | Levamisole                         | 205    | 178<br>91      | 100 | 20<br>30 | 3 | 6.95  | 0.92 | Positive |
|                         | Metronidazole                      | 172.1  | 128<br>82      | 90  | 12<br>26 | 3 | 5.86  | 1.1  | Positive |
|                         | Hydroxy metronidazole<br>(MNZOH)   | 188.1  | 126<br>123     | 90  | 15<br>10 | 3 | 4.51  | 1.2  | Positive |



|                            |                      |        |                |     |          |   |       |      |          |
|----------------------------|----------------------|--------|----------------|-----|----------|---|-------|------|----------|
| Imidazoles & Benzimidazole | Nimorazole           | 227.1  | 114.1<br>100.1 | 110 | 10<br>20 | 3 | 2.96  | 1.2  | Positive |
|                            | Oxfendazole          | 316.1  | 191<br>159     | 150 | 17<br>35 | 3 | 14.09 | 1    | Positive |
|                            | Oxibendazole         | 250.1  | 218.1<br>176   | 130 | 14<br>27 | 3 | 13.99 | 1    | Positive |
|                            | Ronidazole           | 201.1  | 140<br>55      | 90  | 4<br>18  | 3 | 6.24  | 1.1  | Positive |
|                            | Secnidazole          | 186.1  | 128.1<br>59    | 90  | 15<br>20 | 3 | 8.35  | 0.91 | Positive |
|                            | Tinidazole           | 248    | 121<br>93      | 100 | 15<br>20 | 3 | 7.78  | 0.84 | Positive |
|                            | Triclabendazole      | 359    | 343.9<br>274   | 176 | 24<br>40 | 3 | 18.58 | 1    | Positive |
|                            | 2-Aminobenzimidazole | 134.1  | 92<br>65.1     | 100 | 25<br>35 | 3 | 6.07  | 1    | Positive |
|                            | 5-Hydroxymebendazole | 298.15 | 266.1<br>160   | 140 | 19<br>36 | 3 | 13.03 | 0.9  | Positive |
|                            | 5-Nitrobenzimidazole | 164.1  | 118<br>91      | 90  | 22<br>40 | 3 | 8.1   | 1    | Positive |
|                            | Albendazole          | 266.1  | 234.1<br>191   | 130 | 16<br>34 | 3 | 15.65 | 1    | Positive |
|                            | Albendazole sulfone  | 298.1  | 266.1<br>159   | 160 | 16<br>39 | 3 | 13.03 | 0.9  | Positive |

|                                                      |       |              |     |          |   |       |      |          |
|------------------------------------------------------|-------|--------------|-----|----------|---|-------|------|----------|
| Mebendazole-amine<br>(HMEB)                          | 238   | 105<br>77    | 200 | 25<br>40 | 3 | 12.67 | 1    | Positive |
| Benzimidazole                                        | 119.1 | 92<br>65.1   | 90  | 30<br>35 | 3 | 4.53  | 1    | Positive |
| Cambendazole                                         | 303.1 | 261<br>217.1 | 120 | 16<br>32 | 3 | 13.97 | 1    | Positive |
| Dimetridazole                                        | 142.1 | 96<br>81     | 90  | 14<br>30 | 3 | 6.42  | 1    | Positive |
| Fenbendazole                                         | 300.1 | 268<br>159   | 140 | 18<br>36 | 3 | 16.72 | 1    | Positive |
| Flubendazole                                         | 314.1 | 282.1<br>123 | 140 | 18<br>37 | 3 | 15.88 | 1    | Positive |
| 2-Hydroxymethyl-1-methyl-5-nitroimidazole<br>(HMMNI) | 158.1 | 140<br>55    | 90  | 10<br>18 | 3 | 5.55  | 1.2  | Positive |
| Ipronidazole                                         | 170.1 | 124<br>109   | 90  | 16<br>26 | 3 | 12.07 | 1    | Positive |
| Hydroxy-ipronidazole                                 | 186.1 | 168<br>122   | 90  | 10<br>20 | 3 | 10.53 | 1    | Positive |
| Mebendazole                                          | 296.1 | 264.1<br>105 | 140 | 18<br>35 | 3 | 15.5  | 1    | Positive |
| Thiabendazole                                        | 202   | 175<br>131   | 150 | 25<br>35 | 3 | 9.23  | 0.97 | Positive |
| Virginiamycin M1                                     | 526.3 | 508.4<br>355 | 130 | 15<br>20 | 3 | 16.32 | 1    | Positive |

|                   |               |       |                |     |          |   |       |      |          |
|-------------------|---------------|-------|----------------|-----|----------|---|-------|------|----------|
| Other antibiotics | Ivermectin    | 897.4 | 753.3<br>329.2 | 200 | 46<br>60 | 3 | 20.4  | 1    | Positive |
|                   | Valnemulin    | 567.4 | 263<br>164     | 144 | 16<br>28 | 4 | 16.2  | 1.2  | Positive |
|                   | Florfenicol   | 356   | 336<br>185.1   | 141 | 0<br>12  | 3 | 10.76 | 1.2  | Negative |
|                   | Cinoxacin     | 263   | 217<br>189     | 100 | 20<br>30 | 3 | 12.92 | 1.29 | Positive |
|                   | Ciprofloxacin | 332.1 | 314.1<br>231   | 135 | 20<br>42 | 3 | 9.77  | 0.97 | Positive |
|                   | Danofloxacin  | 358.1 | 340.1<br>255   | 140 | 25<br>46 | 3 | 10.05 | 1    | Positive |
|                   | Difloxacin    | 400   | 382.1<br>356.1 | 140 | 20<br>20 | 3 | 10.54 | 1.04 | Positive |
|                   | Enoxacin      | 321   | 303.2<br>232.1 | 125 | 20<br>36 | 3 | 9.23  | 0.91 | Positive |
|                   | Enrofloxacin  | 360   | 342.1<br>316.2 | 120 | 20<br>20 | 3 | 9.97  | 0.99 | Positive |
|                   | Fleroxacin    | 370.1 | 326<br>269     | 130 | 15<br>25 | 3 | 8.65  | 0.92 | Positive |
|                   | Flumequine    | 262   | 202<br>126     | 100 | 30<br>50 | 3 | 15.19 | 1.52 | Positive |
|                   | Gatifloxacin  | 376.2 | 261<br>245     | 130 | 40<br>60 | 3 | 11.34 | 1.13 | Positive |

|            |                |       |                |     |          |   |       |      |          |
|------------|----------------|-------|----------------|-----|----------|---|-------|------|----------|
| Quinolones | Gemifloxacin   | 390.1 | 372<br>313     | 135 | 15<br>30 | 3 | 13.11 | 1    | Positive |
|            | Lomefloxacin   | 352.1 | 308.1<br>265.1 | 130 | 10<br>20 | 3 | 10.27 | 1.02 | Positive |
|            | Marbofloxacin  | 363   | 345.1<br>320.1 | 120 | 20<br>10 | 3 | 8.43  | 0.92 | Positive |
|            | Moxifloxacin   | 402.2 | 364.2<br>260.1 | 150 | 30<br>40 | 3 | 12.39 | 1.23 | Positive |
|            | Nadifloxacin   | 361.1 | 283<br>257     | 140 | 45<br>45 | 3 | 15.71 | 1.57 | Positive |
|            | Nalidixic acid | 233   | 215<br>187     | 100 | 10<br>20 | 3 | 14.93 | 1.49 | Positive |
|            | Norfloxacin    | 320   | 302.1<br>276.1 | 130 | 20<br>15 | 3 | 9.45  | 0.94 | Positive |
|            | Ofloxacin      | 362   | 318.1<br>261.1 | 130 | 15<br>26 | 3 | 9.11  | 0.92 | Positive |
|            | Orbifloxacin   | 396.1 | 352.1<br>295.1 | 130 | 15<br>22 | 3 | 10.51 | 1.04 | Positive |
|            | Oxolinic acid  | 262.1 | 216<br>160     | 90  | 30<br>40 | 3 | 13.51 | 1.35 | Positive |
|            | Pefloxacin     | 334.2 | 290.1<br>233.1 | 174 | 16<br>28 | 4 | 9.32  | 1.2  | Positive |
|            | Sarafloxacin   | 386.1 | 368.1<br>342.1 | 130 | 20<br>15 | 3 | 10.91 | 10.8 | Postive  |

|               |                       |        |       |    |   |       |      |          |
|---------------|-----------------------|--------|-------|----|---|-------|------|----------|
| Tetracyclines | Pipemidic acid        | 304    | 286   | 17 | 3 | 8.1   | 0.92 | Positive |
|               |                       |        | 215   | 35 |   |       |      |          |
|               |                       |        | 286   | 17 |   |       |      |          |
|               | Sparfloxacin          | 393.1  | 215   | 35 | 3 | 12.02 | 1.19 | Positive |
|               |                       |        | 349   | 20 |   |       |      |          |
|               |                       |        | 292   | 36 |   |       |      |          |
|               | Tosufloxacin          | 405.1  | 314   | 40 | 3 | 12.71 | 1.26 | Positive |
|               |                       |        | 263   | 40 |   |       |      |          |
|               | Demeclocycline        | 465.1  | 448   | 15 | 3 | 10.87 | 1.08 | Positive |
|               |                       |        | 430   | 22 |   |       |      |          |
|               | Oxytetracycline (OTC) | 461.15 | 443.1 | 8  | 3 | 9.75  | 1.09 | Positive |
|               |                       |        | 426   | 16 |   |       |      |          |
| Tetracyclines | Flunixin              | 297.1  | 279   | 20 | 3 | 17.63 | 1    | Positive |
|               |                       |        | 264   | 30 |   |       |      |          |
|               |                       |        | 209   | 7  |   |       |      |          |
|               | Ketoprofen            | 255.2  | 105   | 15 | 3 | 16.52 | 1    | Positive |
|               |                       |        | 105   | 28 |   |       |      |          |
|               |                       |        | 77    | 56 |   |       |      |          |
|               | Ketotifen             | 310.1  | 96.1  | 20 | 3 | 12.86 | 1    | Positive |
|               |                       |        | 82.1  | 40 |   |       |      |          |
|               | Lornoxicam            | 372    | 121   | 20 | 3 | 15.61 | 1    | Positive |
|               |                       |        | 95.1  | 20 |   |       |      |          |
|               | Melitracene           | 292.2  | 247.1 | 20 | 3 | 15.88 | 1    | Positive |
|               |                       |        | 217.1 | 40 |   |       |      |          |

|                                                 |                          |        |                    |     |                |   |       |     |          |
|-------------------------------------------------|--------------------------|--------|--------------------|-----|----------------|---|-------|-----|----------|
| NSAID<br>(Non-steroidal anti-inflammatory drug) | Meloxicam                | 352    | 140.9<br>115       | 123 | 16<br>16       | 4 | 16.53 | 1.2 | Positive |
|                                                 | Nabumetone               | 229    | 171<br>128         | 120 | 15<br>20       | 3 | 17.23 | 1   | Positive |
|                                                 | Naproxen                 | 231    | 185<br>141         | 120 | 10<br>40       | 3 | 16.81 | 1   | Positive |
|                                                 | Oxaprozin                | 294.1  | 276.1<br>103.1     | 150 | 20<br>40       | 3 | 17.67 | 1   | Positive |
|                                                 | Piroxicam                | 332.13 | 95<br>78           | 132 | 20<br>76       | 4 | 15.48 | 1.2 | Positive |
|                                                 | Sulindac                 | 357.1  | 340.1<br>248.1     | 150 | 20<br>40       | 4 | 16.48 | 1.2 | Positive |
|                                                 | Tenoxicam                | 338    | 233.1<br>121<br>78 | 132 | 24<br>72       | 4 | 13.2  | 1.2 | Positive |
|                                                 | Tolfenamic acid          | 262.1  | 244<br>180         | 100 | 10<br>40       | 3 | 18.98 | 1   | Positive |
|                                                 | Antipyrine               | 189    | 147<br>77          | 90  | 20<br>30       | 3 | 10.8  | 1   | Positive |
|                                                 | 4-Acetamido antipyrine   | 246.1  | 227.9<br>104<br>83 | 112 | 12<br>20<br>40 | 4 | 8.99  | 1.2 | Positive |
| Antipyretic analgesics                          | 4-Formylamino antipyrine | 232.1  | 104<br>83          | 117 | 20<br>20       | 4 | 8.73  | 1.2 | Positive |

|                     |                       |        |            |     |          |   |       |     |          |
|---------------------|-----------------------|--------|------------|-----|----------|---|-------|-----|----------|
|                     | Paracetamol           | 152.1  | 110<br>65  | 110 | 13<br>32 | 3 | 6.06  | 1   | Positive |
|                     | Phenacetin            | 180    | 138<br>110 | 110 | 11<br>19 | 3 | 13.54 | 0.8 | Positive |
| Antiviral drugs     | Amantadine            | 152.1  | 135        | 112 | 18       | 4 | 10.49 | 1.2 | Positive |
|                     |                       |        | 93.1       |     | 32       |   |       |     |          |
|                     |                       |        | 77.1       |     | 50       |   |       |     |          |
| Anticoccidial drugs | Monensin              | 688.5  | 635.4      | 150 | 12       | 3 | 20.04 | 1.4 | Positive |
|                     |                       |        | 461.3      |     | 23       |   |       |     |          |
|                     |                       |        | 334.1      |     | 16       |   |       |     |          |
|                     | Nequinat              | 366.2  | 200.9      | 169 | 32       | 4 | 18.42 | 1.2 | Positive |
|                     |                       |        | 145        |     | 56       |   |       |     |          |
|                     |                       |        | 91         |     | 44       |   |       |     |          |
|                     | Robenidine            | 334.06 | 155        | 156 | 16       | 4 | 16.38 | 1.2 | Positive |
|                     |                       |        | 111        |     | 56       |   |       |     |          |
|                     | Toltrazuril           | 424.12 | 424.1      | 108 | 0        | 4 | 15.79 | 1   | Negative |
|                     |                       |        | 42.2       |     | 16       |   |       |     |          |
|                     |                       |        | 457        |     | 0        |   |       |     |          |
|                     | Toltrazuril sulfone   | 457    | 456        | 149 | 0        | 4 | 15.1  | 1   | Negative |
|                     |                       |        | 42.2       |     | 50       |   |       |     |          |
|                     | Toltrazuril sulfoxide | 440    | 371        | 112 | 12       | 4 | 14.42 | 1   | Negative |
|                     |                       |        | 42.1       |     | 16       |   |       |     |          |
|                     |                       |        | 167        |     | 15       |   |       |     |          |
|                     | Pirbuterol acetate    | 241.15 | 149        | 100 | 25       | 3 | 4.5   | 1   | Positive |

|                        |                         |       |                |     |          |   |       |      |          |
|------------------------|-------------------------|-------|----------------|-----|----------|---|-------|------|----------|
| Other veterinary drugs | Penbutolol              | 292.2 | 236<br>133     | 122 | 12<br>24 | 4 | 15.87 | 1.2  | Positive |
|                        | Propranolol             | 260   | 116<br>56      | 95  | 16<br>28 | 4 | 9.1   | 1    | Positive |
|                        | Trimethoprim            | 291.1 | 230.1<br>123   | 120 | 25<br>25 | 3 | 8.45  | 0.92 | Positive |
|                        | 2-Mercaptobenzimidazole | 151   | 93<br>65       | 110 | 15<br>20 | 3 | 9.82  | 1    | Positive |
|                        | Azaperol                | 330   | 149<br>121     | 115 | 25<br>30 | 3 | 8.7   | 1    | Positive |
|                        | Azaperone               | 328   | 165<br>121     | 130 | 7<br>21  | 3 | 10.05 | 0.99 | Positive |
|                        | Carazolol               | 299.2 | 222<br>116     | 110 | 15<br>20 | 3 | 12.57 | 1.2  | Positive |
|                        | Carbadox                | 263   | 231<br>90      | 100 | 5<br>30  | 3 | 11.01 | 1    | Positive |
|                        | Clopidol                | 192   | 101<br>87      | 90  | 30<br>35 | 3 | 8.41  | 1    | Positive |
|                        | Dapsone                 | 249.1 | 156<br>92      | 130 | 9<br>23  | 3 | 8.47  | 0.97 | Positive |
|                        | Desoxycarbadox          | 231   | 199<br>143     | 90  | 10<br>20 | 3 | 14.48 | 1    | Positive |
|                        | Halofuginone            | 414   | 120.1<br>100.1 | 150 | 20<br>32 | 3 | 13.92 | 1    | Positive |



|                    |        |                |     |          |   |       |      |          |
|--------------------|--------|----------------|-----|----------|---|-------|------|----------|
| Haloperidol        | 376.1  | 165.1<br>123   | 150 | 20<br>40 | 3 | 14.54 | 1    | Positive |
| Indoprofen         | 282.13 | 236.1<br>77.1  | 174 | 20<br>76 | 4 | 16.04 | 1.2  | Positive |
| Mefenamic acid     | 242.1  | 224.1<br>209.1 | 108 | 8<br>28  | 4 | 18.73 | 1.2  | Positive |
| N-Acetyl dapson    | 291.1  | 180.1<br>197.9 |     | 44<br>12 |   |       |      |          |
|                    |        | 155.8          | 154 | 16       | 4 | 11.08 | 1.2  | Positive |
| Phenylbutazone     | 309    | 160<br>120     | 100 | 20<br>20 | 3 | 17.5  | 1    | Positive |
| Propionylpromazine | 341.2  | 86<br>58       | 125 | 20<br>30 | 3 | 15.69 | 1    | Positive |
| Propyl thiouracil  | 171    | 154<br>112     | 110 | 14<br>17 | 3 | 9.43  | 0.98 | Positive |
|                    |        | 119            |     | 24       |   |       |      |          |
| Tolmetin           | 258.1  | 91             | 132 | 44       | 4 | 16.51 | 1.2  | Positive |
|                    |        | 65.1           |     | 80       |   |       |      |          |
| Xylazine           | 221.1  | 164<br>90      | 150 | 24<br>21 | 3 | 10.5  | 1    | Positive |
| Chloroprocaine     | 271.1  | 154<br>100     | 110 | 25<br>15 | 3 | 7.54  | 0.8  | Positive |
| Cinchocaine        | 344.2  | 271.1<br>215.1 | 150 | 20<br>40 | 3 | 15.62 | 0.8  | Positive |

|                                             |                             |                |                |          |          |       |       |          |          |
|---------------------------------------------|-----------------------------|----------------|----------------|----------|----------|-------|-------|----------|----------|
| CNS drugs<br>(Central nervous system drugs) | Lidocaine                   | 235.2          | 86.1<br>58.2   | 118      | 16<br>36 | 3     | 9.4   | 0.8      | Positive |
|                                             | Procainamide                | 236.2          | 163.1<br>120   | 150      | 20<br>40 | 3     | 4     | 1        | Positive |
|                                             | Procaine                    | 237.2          | 120<br>100.1   | 150      | 20<br>20 | 3     | 5.55  | 0.8      | Positive |
|                                             | Tetracaine                  | 265.2          | 176.1<br>72.1  | 150      | 20<br>20 | 3     | 13.81 | 0.8      | Positive |
|                                             | Alclomethasone dipropionate | 521.2          | 301<br>279     | 130      | 10<br>10 | 3     | 17.76 | 0.6      | Positive |
|                                             | Amcinonide                  | 503.2          | 338.9<br>321   | 110      | 10<br>14 | 3     | 18.25 | 1        | Positive |
|                                             | Beclomethasone              | 409.2          | 391.1<br>146.9 | 110      | 6<br>30  | 3     | 16.38 | 1        | Positive |
|                                             | Beclomethasone dipropionate | 521.2          | 503<br>319     | 115      | 4<br>10  | 3     | 18.51 | 0.6      | Positive |
| Betamethasone valerate                      | 477.3                       | 354.9<br>278.8 | 110            | 4<br>14  | 3        | 18.1  | 1     | Positive |          |
| Betamethasone dipropionate                  | 505.2                       | 318.9<br>278.9 | 110            | 10<br>12 | 3        | 18.3  | 1     | Positive |          |
| Budesonide                                  | 431.2                       | 413.1<br>146.9 | 110            | 6<br>30  | 3        | 17.67 | 1     | Positive |          |
| Chlormadinone acetate                       | 405.2                       | 345.2<br>309.2 | 108            | 8<br>12  | 3        | 18.03 | 1     | Positive |          |

|                  |                            |       |                |     |          |   |       |     |          |
|------------------|----------------------------|-------|----------------|-----|----------|---|-------|-----|----------|
| Steroid hormones | Clobetasol 17-propionate   | 467.2 | 372.9<br>354.9 | 110 | 6<br>8   | 3 | 17.86 | 1   | Positive |
|                  | Clobetasone 17-butyrate    | 479.2 | 342.8<br>278.9 | 150 | 12<br>14 | 3 | 18.23 | 1   | Positive |
|                  | Cortisone                  | 361.2 | 163.1<br>121   | 150 | 20<br>30 | 3 | 15.28 | 0.5 | Positive |
|                  | Deflazacort                | 442.2 | 141.9<br>123.9 | 180 | 36<br>50 | 3 | 16.95 | 1   | Positive |
|                  | Dexamethasone              | 393.1 | 355<br>146.8   | 125 | 4<br>25  | 3 | 16.27 | 0.6 | Positive |
|                  | Diflorasone diacetate      | 495.2 | 316.8<br>278.8 | 120 | 8<br>10  | 3 | 17.26 | 0.6 | Positive |
|                  | Epitestosterone            | 289.2 | 109<br>97      | 135 | 22<br>24 | 3 | 17.8  | 0.6 | Positive |
|                  | Fludrocortisone 21-acetate | 423.2 | 238.9<br>120.9 | 160 | 22<br>36 | 3 | 16.38 | 1   | Positive |
|                  | Fludroxycortide            | 437.2 | 180.9<br>120.8 | 160 | 30<br>40 | 3 | 16.75 | 1   | Positive |
|                  | Flumethasone               | 411.2 | 253<br>121.1   | 120 | 10<br>34 | 3 | 16.01 | 1   | Positive |
|                  | Flumethasone pivalate      | 495.3 | 475.2<br>57.1  | 150 | 10<br>20 | 3 | 18.17 | 0.6 | Positive |
|                  | Fluocinolone acetonide     | 453.2 | 413.2<br>121.1 | 150 | 10<br>40 | 3 | 16.38 | 1   | Positive |

|                               |       |                |     |          |   |       |     |          |
|-------------------------------|-------|----------------|-----|----------|---|-------|-----|----------|
| Fluoromethalone               | 377.2 | 320.9<br>278.9 | 110 | 8<br>10  | 3 | 16.58 | 1   | Positive |
| Fluticasone propionate        | 501.2 | 312.9<br>292.9 | 110 | 8<br>10  | 3 | 17.8  | 1   | Positive |
| Halcinonide                   | 455.2 | 121<br>104.9   | 160 | 40<br>48 | 3 | 18.03 | 1   | Positive |
| Hydrocortisone                | 363.2 | 121<br>105.1   | 130 | 24<br>50 | 3 | 15.68 | 1   | Positive |
| Megestrol acetate             | 385.2 | 325.2<br>267.2 | 100 | 8<br>12  | 3 | 18.02 | 1   | Positive |
| Melengestrol acetate          | 397.2 | 337.3<br>279.2 | 136 | 8<br>20  | 3 | 18.19 | 1   | Positive |
| Methylprednisolone            | 375.2 | 357.1<br>161.1 | 110 | 6<br>20  | 3 | 16.4  | 1   | Positive |
| Methylprednisolone 21-acetate | 417.2 | 399.2<br>253.2 | 110 | 6<br>18  | 3 | 17.07 | 1   | Positive |
| Methyltestosterone            | 303.2 | 109.1<br>97.1  | 166 | 32<br>32 | 4 | 17.68 | 1.2 | Positive |
| Mometasone furoate            | 521.1 | 503<br>263     | 120 | 4<br>24  | 3 | 17.81 | 0.6 | Positive |
| Nandrolone                    | 275.2 | 239.1<br>109   | 140 | 13<br>24 | 3 | 16.93 | 1   | Positive |
| Prednicarbate                 | 489.2 | 380.9<br>114.8 | 120 | 6<br>12  | 3 | 18.02 | 1   | Positive |

|             |                         |        |                |     |          |   |       |     |          |
|-------------|-------------------------|--------|----------------|-----|----------|---|-------|-----|----------|
|             | Prednisolone            | 361.2  | 343.1<br>146.9 | 110 | 6<br>20  | 3 | 15.64 | 0.5 | Positive |
|             | Prednisone              | 359.2  | 341.1<br>147   | 110 | 6<br>24  | 3 | 15.15 | 0.8 | Positive |
|             | Progesterone            | 315.2  | 109<br>97      | 140 | 25<br>21 | 3 | 18.3  | 0.8 | Positive |
|             | Testosterone            | 289.2  | 109<br>97      | 140 | 23<br>21 | 3 | 17.29 | 0.6 | Positive |
|             | Triamcinolone acetonide | 435.2  | 396.9<br>338.9 | 110 | 10<br>10 | 3 | 16.41 | 0.8 | Positive |
|             | Betamethasone           | 393.2  | 373.2          | 103 | 4        | 4 | 16.27 | 1.2 | Positive |
|             |                         |        | 355.2<br>147.1 |     | 8<br>32  |   |       |     |          |
|             | 4-Nitrophenol           | 138    | 107.9<br>92    | 112 | 24<br>56 | 4 | 12.87 | 1.2 | Negative |
|             | Carbofuran              | 222.12 | 165.1<br>123.1 | 110 | 20<br>30 | 3 | 15.02 | 1.2 | Positive |
|             | Chlordimeform           | 197.1  | 117<br>46.2    | 120 | 32<br>16 | 4 | 5.83  | 1   | Positive |
| insecticide | Coumaphos               | 363    | 334.9          | 120 | 16       | 4 | 18.19 | 1.2 | Positive |
|             |                         |        | 226.9          |     | 32       |   |       |     |          |
|             | Propetamphos            | 282.11 | 156<br>137.9   | 125 | 4<br>20  | 4 | 17.33 | 1.2 | Positive |

|                    |        |     |     |    |   |       |     |          |
|--------------------|--------|-----|-----|----|---|-------|-----|----------|
|                    |        | 109 |     | 20 |   |       |     |          |
| Dichlorvos         | 221    | 79  | 100 | 32 | 4 | 14.78 | 1.2 | Positive |
|                    |        | 60  |     | 80 |   |       |     |          |
|                    |        | 280 |     | 16 |   |       |     |          |
| Fenthion sulfoxide | 295.02 | 109 | 140 | 32 | 3 | 15.2  | 1.2 | Positive |
|                    |        | 79  |     | 48 |   |       |     |          |

---
