# Supplementary material
Source: MDPI journal article supplement (https://www.mdpi.com/2077-0472/12/6/869)
Supplement: s1 [file s1]

**Table S1. Methods for the determination of veterinary drugs and pesticides in eggs**

| compounds         | matrix | Sample preparation technique                                                                                                                                                                           | Stationary phase                                                                                               | Mobile phase                                                                                                                        | Detection-<br>identification           | Recoveries                             | Referen<br>ce |
|-------------------|--------|--------------------------------------------------------------------------------------------------------------------------------------------------------------------------------------------------------|----------------------------------------------------------------------------------------------------------------|-------------------------------------------------------------------------------------------------------------------------------------|----------------------------------------|----------------------------------------|---------------|
| 178 pesticides    | eggs   | Extraction by matrix solid phase dispersion with 50ml Cyclohexane/ethyl acetate; solid phase extractions (SPE) for GC (200mg C18 / 40mgPSA +ACN) and LC (250 mg C18 + acidified MeOH)                  | Zorbax Eclipse plus-C18 (2.1 mm × 100 mm, 3.5 µm)                                                              | A: water; B: methanol both containing 5 mmol/l ammonium formate and 0.02 5% formic acid                                             | LC-ESI-MS/ MS (+) and (-)              | 1%(Oxydemeton-methyl)~142%(Iprodione)  | 1             |
| 60 pesticides     | eggs   | Extraction with 1% acetic acid in acetonitrile; d-SPE clean-up:400 mg PSA, 400 mg C18, 45 mg GC B and 1,200 mg MgSO <sub>4</sub> for GC-MS/MS;120 mg Z-Sep, and 300 mg Discovery® DSC-18 for LC-MS /MS | LC: Zorbax Eclipse Plus C18 column (2.1×100 mm, 3.5 µm)<br>GC: HP-5MS capillary column (30m×0.25 mm, 0.25 µm.) | LC: A: 5mM ammonium acetate and 0.1% (v/v) formic acid in water; B: 0.1% (v/ v) formic acid in methanol                             | LC-ESI-MS/ MS (+) and (-) and GC-MS/MS | 70.1%(Carbendazim)~119.0%(Vinclozolin) | 2             |
| 10 anticoccidials | eggs   | Extraction with acetonitrile; no clean-up                                                                                                                                                              | Zorbax Eclipse XDB-C8 column (150 mm × 3 mm, 5 µm)                                                             | A: water; B: methanol; C: acetonitrile                                                                                              | LC-ESI-MS/ MS (+) and (-)              | 84.6% (Lasalocid)~108.4%(Diclazuril)   | 3             |
| 11 coccidiostats  | eggs   | Extraction with acetonitrile, cleanup with hexane partitioning and a silica SPE cartridge.                                                                                                             | Synergi Fusion column (150 mm × 2.0 mm,4 µm)                                                                   | A: aqueous solution containing 0.1% (v/v) formic acid; B: acetonitrile containing 0.1% (v/v) formic acid and 0.02 mM sodium acetate | LC-ESI-MS/ MS (+) and (-)              | 68.8%(halofuginone)~113.0%(monensin)   | 4             |

|                                                                           |                                     |                                                                                                                                                                                                                                                    |                                                         |                                                                                                                  |                              |                                                               |   |
|---------------------------------------------------------------------------|-------------------------------------|----------------------------------------------------------------------------------------------------------------------------------------------------------------------------------------------------------------------------------------------------|---------------------------------------------------------|------------------------------------------------------------------------------------------------------------------|------------------------------|---------------------------------------------------------------|---|
| 14 coccidiostats                                                          | poultry muscle and eggs             | Extraction with 10 mL of ACN; low-temperature clean up step consisting in maintain the tubes at −30 to −10 °C for 40–60 min in a freezer.                                                                                                          | Poroshell 120 EC-C18 column (50 mm×3.0 mm,2.7 μm)       | A: water; B: ACN both with 5 mmol L <sup>−1</sup> of formic acid and 1 mmol L <sup>−1</sup> of ammonium acetate. | HPLC–QqLIT-MS/MS (+) and (-) | 73.18% (diaveridine)~ 114.13% (narasin)                       | 5 |
|                                                                           | chicken liver; chicken muscle; eggs | Extraction with acetonitrile/water (90/10, v/v); solid phase extraction (SPE) on Bond Elut Mycotoxin cartridges                                                                                                                                    | Thermo Hypersil Gold C18 column (150 mm × 2.1 m,3.5 μm) | A: water; B: acetonitrile                                                                                        | LC-ESI-MS/ MS (+) and (-)    | 64.8% (3- acetyldeoxynivalenol) ~ 108.2% (diacetoxyscirpenol) | 6 |
|                                                                           | chicken muscle; eggs                | Extraction with 10 mL of an acetonitrile/water mixture (90:10, v/v); auto solid-phase extraction (SPE)Oasis HLB cartridge                                                                                                                          | Hypersil Gold C18 (150 × 2.1 mm, 5 μm)                  | A: 0.1% formic acid in water; B: MeCN.                                                                           | LC-ESI-MS/ MS (+) and (-)    | —                                                             | 7 |
| 120 drugs                                                                 | eggs                                | Extraction with acetonitrile (30 ml) and concentrated formic acid (30 μl); 101compounds: dSPE clean up with Na <sub>2</sub> SO <sub>4</sub> /PSA/C18 (900/50/150 mg); 6 compounds: dSPE clean up with MgSO <sub>4</sub> /PSA/C18 (1200/400/400 mg) | Acquity BEH C18 LC column (2.1 × 100 mm, 1.7 μm)        | A: water; B: methanol both containing 0.5 mM of ammonium formate and 0.1% formic acid.                           | LC-ESI-MS/ MS (+) and (-)    | —                                                             | 8 |
| 105 antibiotic, anti-inflammatory, antiparasitic agents and tranquilizers | eggs                                |                                                                                                                                                                                                                                                    |                                                         |                                                                                                                  |                              |                                                               |   |

## References

1. Bilandzic, N.; Bozic, D.; Kolanovic, B. S.; Varenina, I.; Cvetnic, L.; Cvetnic, Z., Distribution of sulfamonomethoxine and trimethoprim in egg yolk and white. *Food Chemistry* **2015**, *178*, 32-37.
2. Hildmann, F.; Gottert, C.; Frenzel, T.; Kempe, G.; Speer, K., Pesticide residues in chicken eggs - A sample preparation methodology for analysis by gas and liquid chromatography/tandem mass spectrometry. *Journal of Chromatography A* **2015**, *1403*, 1-20.
3. Song, N.-E.; Lee, J. Y.; Mansur, A. R.; Jang, H. W.; Lim, M.-C.; Lee, Y.; Yoo, M.; Nam, T. G., Determination of 60 pesticides in hen eggs using the QuEChERS procedure followed by LC-MS/MS and GC-MS/MS. *Food Chemistry* **2019**, 298.
37. Dubreil-Cheneau, E.; Bessiral, M.; Roudaut, B.; Verdon, E.; Sanders, P., Validation of a multi-residue liquid chromatography-tandem mass spectrometry confirmatory method for 10 anticoccidials in eggs according to Commission Decision 2002/657/EC. *Journal of Chromatography A* **2009**, *1216* (46), 8149-8157.
4. Galarini, R.; Fioroni, L.; Moretti, S.; Pettinacci, L.; Dusi, G., Development and validation of a multi-residue liquid chromatography-tandem mass spectrometry confirmatory method for eleven coccidiostats in eggs. *Analytica Chimica Acta* **2011**, *700* (1-2), 167-176.
5. Barreto, F.; Ribeiro, C.; Hoff, R. B.; Dalla Costa, T., A simple and high-throughput method for determination and confirmation of 14 coccidiostats in poultry muscle and eggs using liquid chromatography - quadrupole linear ion trap - tandem mass spectrometry (HPLC-QqLIT-MS/MS): Validation according to European Union 2002/657/EC. *Talanta* **2017**, *168*, 43-51.
14. Chen, D.; Cao, X.; Tao, Y.; Wu, Q.; Pan, Y.; Peng, D.; Liu, Z.; Huang, L.; Wang, Y.; Wang, X.; Yuan, Z., Development of a liquid chromatography-tandem mass spectrometry with ultrasound-assisted extraction and auto solid-phase clean-up method for the determination of Fusarium toxins in animal derived foods. *Journal of Chromatography A* **2013**, *1311*, 21-29.
6. Chen, D.; Yu, J.; Tao, Y.; Pan, Y.; Xie, S.; Huang, L.; Peng, D.; Wang, X.; Wang, Y.; Liu, Z.; Yuan, Z., Qualitative screening of veterinary anti-microbial agents in tissues, milk, and eggs of food-producing animals using liquid chromatography coupled with tandem mass spectrometry. *Journal of Chromatography B-Analytical Technologies in the Biomedical and Life Sciences* **2016**, *1017*, 82-88.
7. Desmarchelier, A.; Fan, K.; Mai Minh, T.; Savoy, M.-C.; Tarres, A.; Fuger, D.; Goyon, A.; Bessaire, T.; Mottier, P., Determination of 105 antibiotic, anti-inflammatory, antiparasitic agents and tranquilizers by LC-MS/MS based on an acidic QuEChERS-like extraction. *Food Additives and Contaminants Part a-Chemistry Analysis Control Exposure & Risk Assessment* **2018**, *35* (4), 646-660.
8. da Silveira, V. G.; Oliveira, M. S.; de Almeida, C. A. A.; Hoff, R. B.; Mallmann, C. A., Liquid Chromatography-Tandem Mass Spectrometry Determination and Depletion Profile of Chlortetracycline, Doxycycline, and Oxytetracycline in Broiler Chicken Muscle After Oral Administration. *Food Analytical Methods* **2018**, *11* (8), 2181-2194.
