# Supplementary material
Source: MDPI journal article supplement (https://www.mdpi.com/2077-0472/12/6/869)

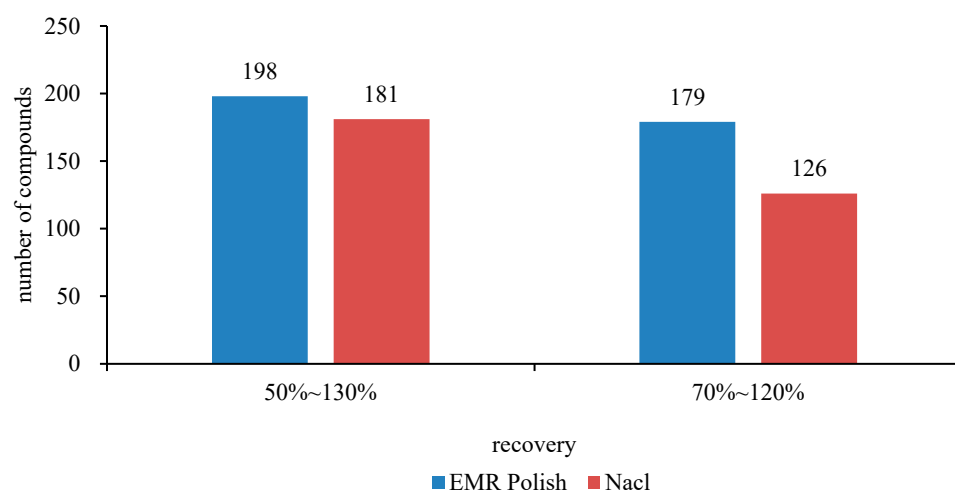

Figure S1 Effect of EMR and NaCl on the number of chemical contaminants in the recovery of 50%-130% and

70%-120%

Supplement: s1 [file s1]
